# Supplementary material
Source: Royal Society of Chemistry journal article supplement (doi:10.1039/d5dd00576k)
Supplement: d5dd00576k1.pdf [file d5dd00576k1.pdf]

## Supplementary information

### Figures

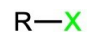

R = alkyl, alkenyl, aryl; X = F, Cl, Br, I  
[CX4,CX3,c;!\$(#6)=[OX1]][F,Cl,Br,I]

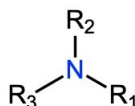

R1 = alkyl, aryl; R2, R3 = H, alkyl, aryl

[NX3](#1,#6!\$(CX3)=[O,S,N,C])&!\$(#6)([NX3])[N,O,S,P]&!\$(C([NX3])#N))  
(#1,#6!\$(CX3)=[O,S,N,C])&!\$(#6)([NX3])[N,O,S,P]&!\$(C([NX3])#N))[#1,#6!\$(CX3)=[O,S,N,C])&!\$(#6)([NX3])[N,O,S,P]&!\$(C([NX3])#N)]

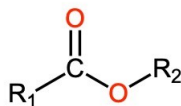

R1 = H, alkyl, aryl; R2 = alkyl, aryl

[#1,#6][CX3](=[OX1])[OX2]#6!\$(CX3)=[OX1,SX1,NX2]]

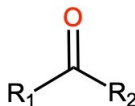

R1, R2 = alkyl, aryl

[#6!\$(C#N)][CX3](=[OX1])#6!\$(C#N)]

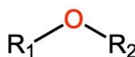

R1, R2 = alkyl, aryl

[#6!\$(CX4)([OX2])([#7,O,S,F,Cl,Br,I,P])&!\$(CX3)([OX2])=[OX1,SX1,NX2,C])  
[OX2]#6!\$(CX4)([OX2])([#7,O,S,F,Cl,Br,I,P])&!\$(CX3)  
([OX2])=[OX1,SX1,NX2,C])]

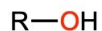

R = alkyl, aryl

[#6!\$(CX4)([OH1])[#8,#16,#7,#15])&!\$(CX3)([OH1])=[OX1,SX1,NH2,C)][OH1]



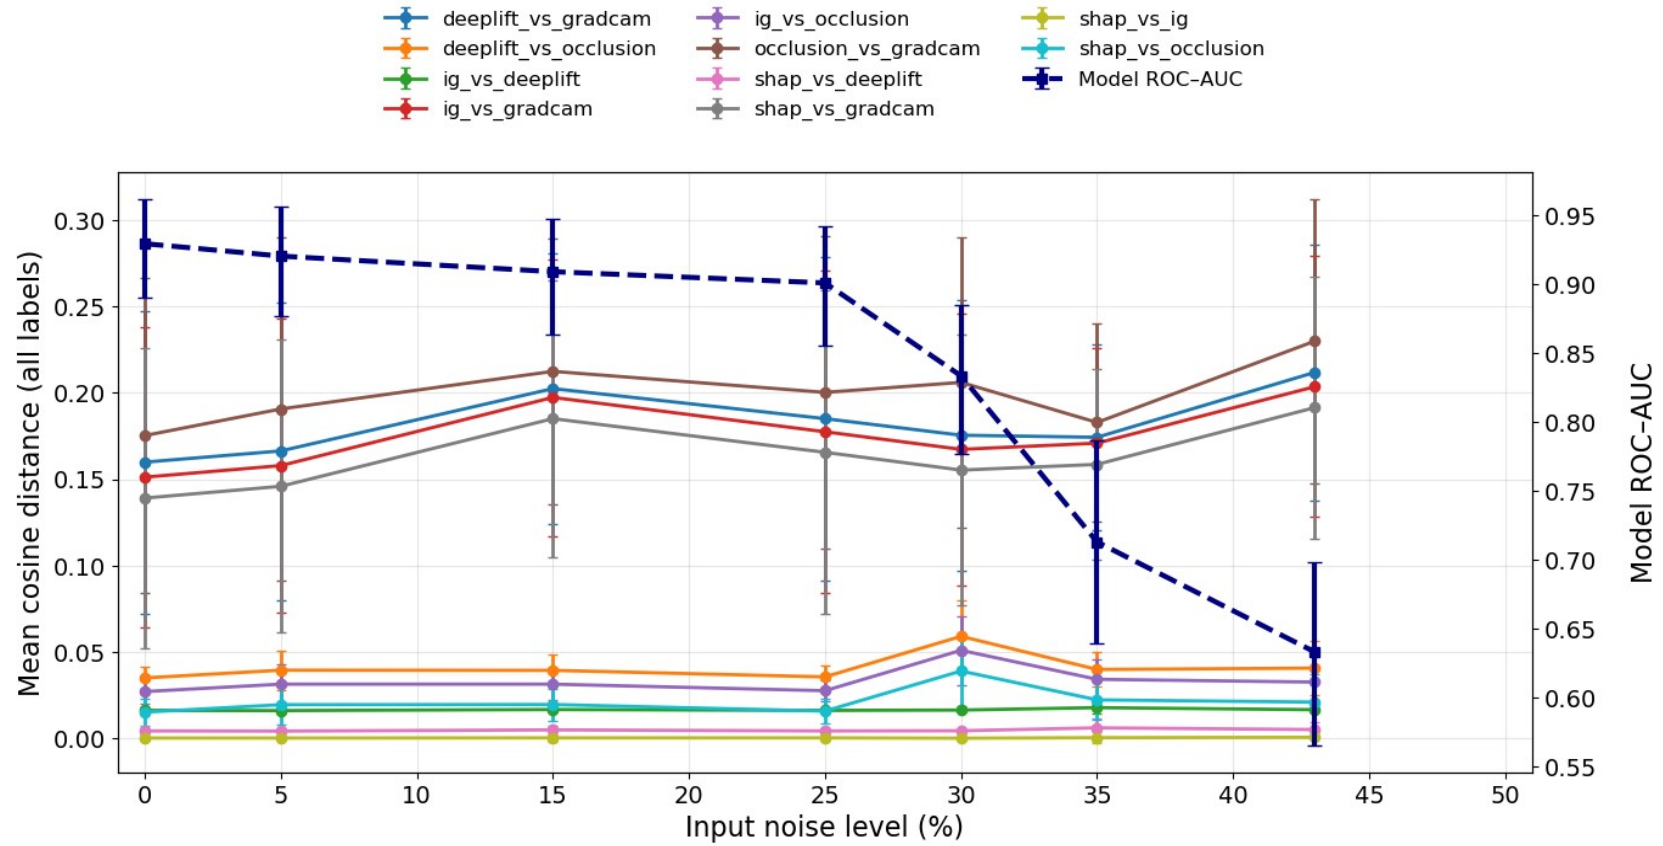

Figure S2: Cosine distance comparisons for all XAI method pairs at different input noise levels for BBB dataset

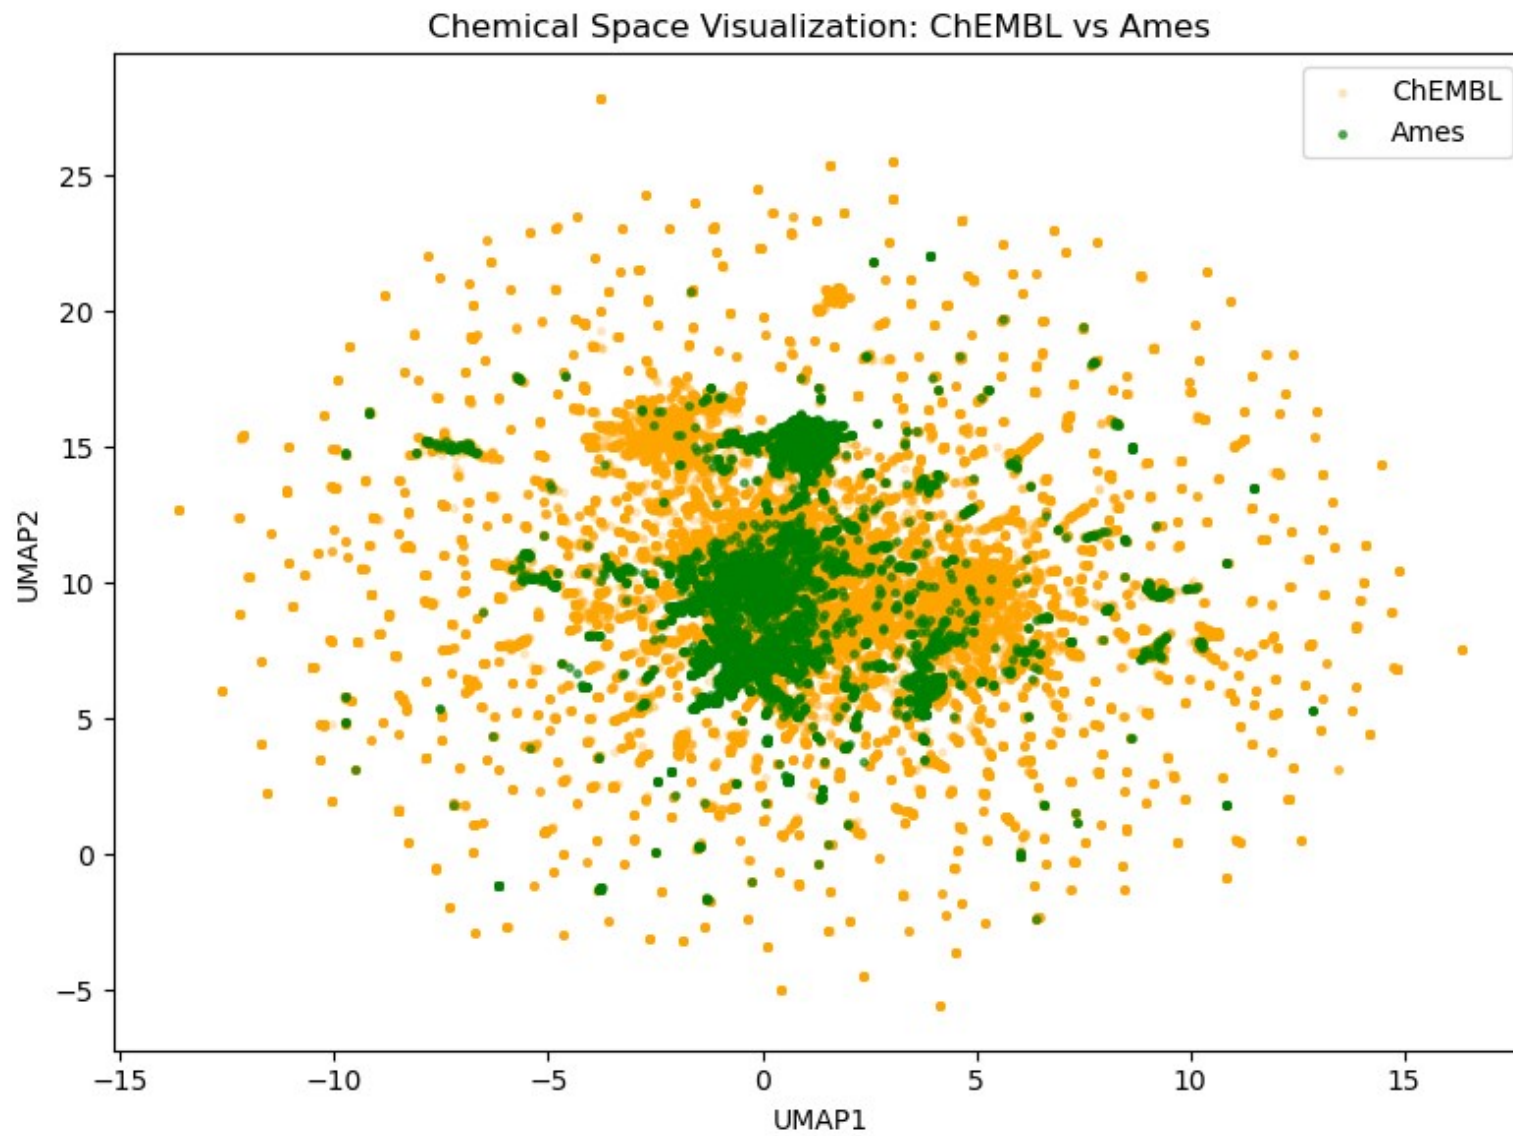

Figure S3: UMAP projection of molecular embedding space: ChEMBL vs Ames dataset

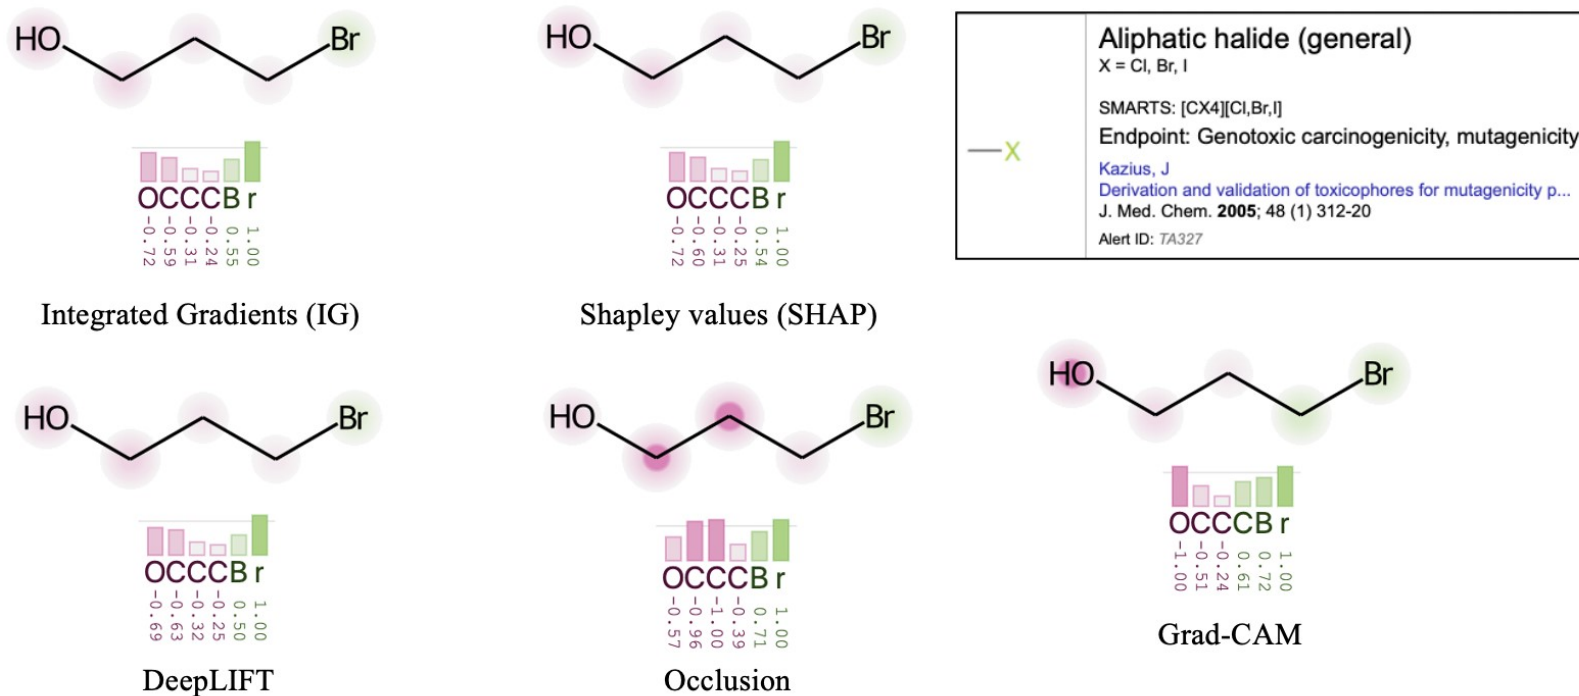

Figure S4: Comparison of atom-level attribution maps for the aliphatic halide toxicophore using five explainability methods: Integrated Gradients (IG), SHAP, DeepLIFT, Occlusion, and Grad-CAM (ROC-AUC = 0.85). In this example, all methods correctly highlight Br as part of the functional group, while Grad-CAM additionally emphasizes the adjacent aliphatic carbon. The color scale encodes relative importance, with magenta indicating low-importance tokens and green indicating high-importance tokens; attribution values were normalized to [-1, 1], such that colors reflect relative magnitude rather than the direction of contribution.

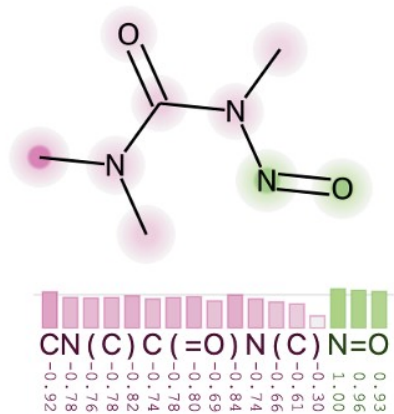

Integrated Gradients (IG)

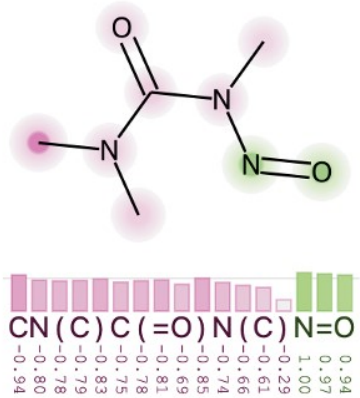

DeepLIFT

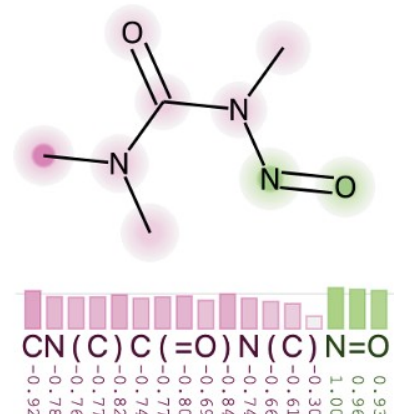

Shapley values (SHAP)

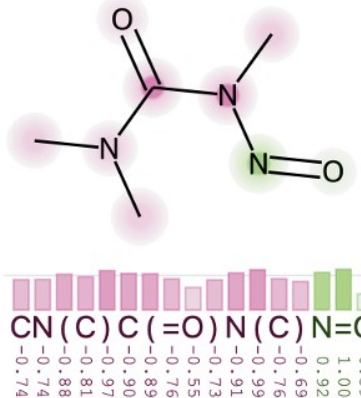

Occlusion

**Nitroso (general)**  
 R = any atom/ group

SMARTS: [NX2]=[OX1]

Endpoint: Genotoxic carcinogenicity, mutagenicity

Kazius, J  
 Derivation and validation of toxicophores for mutagenicity p...  
*J. Med. Chem.* **2005**; 48 (1) 312-20

Alert ID: TA324

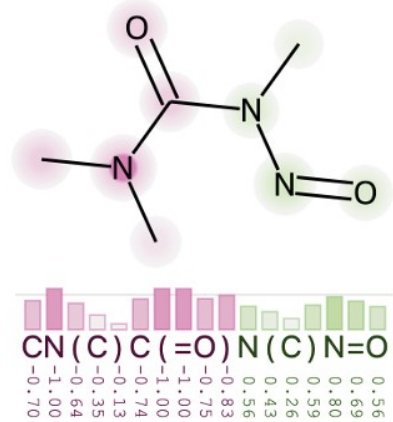

Grad-CAM

Figure S5: Comparison of atom-level attribution maps for the nitroso toxicophore using five explainability methods: Integrated Gradients (IG), SHAP, DeepLIFT, Occlusion, and Grad-CAM (ROC-AUC = 0.85). In this example, all methods highlight the nitroso group (N=O) as the key structural feature contributing to the prediction, while Grad-CAM additionally extends the attribution to the adjacent N-CH<sub>3</sub> substituent. The color

scale encodes relative importance, with magenta indicating low-importance tokens and green indicating high-importance tokens; attribution values were normalized to [-1, 1], such that colors reflect relative magnitude rather than the direction of contribution.

The screenshot displays the OChem ToxAlerts database interface. At the top, the header includes the logo "Online chemical database with modeling environment" and the version "v.4.3.200". A navigation bar contains links for "Home", "Database", "Models", "Tox24 Challenge", and "EUOS25 Challenge", along with a user greeting "Welcome, Dear Ms.Khasanova!" and links for "My account" and "Logout". A "Privacy statement" link is also present.

The main content area is titled "ToxAlerts: Structural alerts browser" and includes a sub-header "Here you can browse structural alerts for various toxicological endpoints". Below this, there are buttons for "Upload new alerts" and "Screen compounds".

A "FILTERS" sidebar on the left allows users to refine their search. It includes fields for "Article:" (set to "All articles"), "Endpoint / Filter type:" (set to "Extended Functional Groups (EFG)"), and "Name / Alert ID:". There is also a checkbox for "Show only approved alerts".

The main list of alerts shows three entries:

- Hydrocarbons** (highlighted in green):  
Compounds containing only C and H atoms  
SMARTS: NOT [#6!#1]  
Endpoint: Extended Functional Groups (EFG)  
Salmina, ES  
Extended Functional Groups (EFG): An Efficient Set for Chemi...  
Molecules 2015; 21 (1)  
Alert ID: TA1105  
13:31, 5 May 12 / 11:57, 31 Oct 15  
SALMINA1987 / published
- Any cations** (highlighted in red):  
Any positively charged atom  
SMARTS: [+ , ++ , +3 , +4 , +5 , +6 , +7 , \$(#7v4) , \$(#8v3)] AND NOT [\$([NX2]=[NX2+]=[NX1-]) , \$([NX2 show full SMARTS  
Endpoint: Extended Functional Groups (EFG)  
CheckMol  
List of functional groups recognized by checkmol...  
2005;  
Alert ID: TA1106  
13:31, 5 May 12 / 11:13, 19 Mar 13  
SALMINA1987 / published
- Any anions** (highlighted in blue):  
Any negatively charged atom  
SMARTS: [- , -- , -3 , -4 , -5 , -6 , -7] AND NOT [\$([NX2]=[NX2+]=[NX1-]) , \$([NX2]=[NX2+]=N) , \$([NX2- show full SMARTS

Figure S6: Accessing SMARTS patterns in the OChem ToxAlerts database

SMARTS patterns used in this study can be accessed through the OCHEM platform via the ToxAlerts database. The navigation path is as follows: OCHEM → Database → ToxAlerts → View alerts. Within the ToxAlerts interface, users can browse structural alerts corresponding to different toxicological endpoints as well as general chemical functional groups. Each alert entry includes the associated SMARTS pattern, which can be viewed and copied directly. Alternatively, the “Screen compounds against alerts” option allows users to apply these SMARTS patterns within the OCHEM environment. For convenience, all SMARTS patterns used in this study are also provided in a machine-readable format in the accompanying GitHub repository.

## Tables

Table S1: Distribution of functional group counts in the dataset.

|                   | 0    | 1    | 2    | 3   | 4   | 5   | 6  | 7 | 8 | 9 | 10 | 11 | 12 | 15 | 19 |
|-------------------|------|------|------|-----|-----|-----|----|---|---|---|----|----|----|----|----|
| halide            | 5839 | 669  | 380  | 174 | 87  | 37  | 41 | 8 | 9 | 2 | 4  | 1  | 2  | 1  | 1  |
| amine             | 5624 | 1184 | 408  | 29  | 7   | 2   | 1  | 1 | 0 | 0 | 0  | 0  | 0  | 0  | 0  |
| carboxylic_esters | 6521 | 561  | 144  | 20  | 9   | 0   | 0  | 0 | 0 | 0 | 0  | 0  | 0  | 0  | 0  |
| ketone            | 6550 | 412  | 260  | 22  | 10  | 0   | 0  | 0 | 0 | 0 | 0  | 0  | 0  | 0  | 0  |
| ether             | 6025 | 896  | 241  | 48  | 25  | 8   | 5  | 4 | 2 | 0 | 1  | 0  | 0  | 0  | 0  |
| carboxylic_acid   | 6653 | 518  | 72   | 4   | 8   | 0   | 0  | 0 | 0 | 0 | 0  | 0  | 0  | 0  | 0  |
| arene             | 2558 | 2202 | 1445 | 588 | 331 | 105 | 21 | 2 | 2 | 1 | 0  | 0  | 0  | 0  | 0  |

|                   |      |     |     |     |    |    |    |   |   |   |   |   |   |   |   |
|-------------------|------|-----|-----|-----|----|----|----|---|---|---|---|---|---|---|---|
| carboxylic_amides | 6669 | 487 | 85  | 7   | 7  | 0  | 0  | 0 | 0 | 0 | 0 | 0 | 0 | 0 | 0 |
| nitro             | 6237 | 812 | 167 | 30  | 8  | 0  | 1  | 0 | 0 | 0 | 0 | 0 | 0 | 0 | 0 |
| hydroxyl          | 5502 | 956 | 488 | 149 | 83 | 42 | 14 | 9 | 5 | 4 | 3 | 0 | 0 | 0 | 0 |

Table S2: Cosine distances between pairs of XAI methods for different functional groups

|                    | halide positive | halide all      | amine positive  | amine all       | carboxylic_esters positive | carboxylic_esters all |
|--------------------|-----------------|-----------------|-----------------|-----------------|----------------------------|-----------------------|
| shap/ig            | 0.0000 ± 0.0002 | 0.0001 ± 0.0010 | 0.0001 ± 0.0009 | 0.0001 ± 0.0015 | 0.0001 ± 0.0003            | 0.0001 ± 0.0004       |
| shap/deeplift      | 0.0010 ± 0.0022 | 0.0034 ± 0.0069 | 0.0021 ± 0.0032 | 0.0023 ± 0.0034 | 0.0056 ± 0.0060            | 0.0044 ± 0.0115       |
| shap/occlusion     | 0.0556 ± 0.0562 | 0.0265 ± 0.0330 | 0.0307 ± 0.0402 | 0.0196 ± 0.0272 | 0.0314 ± 0.0303            | 0.0267 ± 0.0304       |
| shap/gradcam       | 0.4060 ± 0.1782 | 0.2297 ± 0.1576 | 0.3881 ± 0.1850 | 0.2308 ± 0.1595 | 0.3316 ± 0.1670            | 0.2004 ± 0.1262       |
| ig/deeplift        | 0.0010 ± 0.0020 | 0.0032 ± 0.0066 | 0.0019 ± 0.0028 | 0.0022 ± 0.0032 | 0.0053 ± 0.0055            | 0.0043 ± 0.0114       |
| ig/occlusion       | 0.0557 ± 0.0564 | 0.0264 ± 0.0332 | 0.0306 ± 0.0401 | 0.0196 ± 0.0271 | 0.0313 ± 0.0301            | 0.0266 ± 0.0303       |
| ig/gradcam         | 0.4061 ± 0.1785 | 0.2298 ± 0.1576 | 0.3881 ± 0.1848 | 0.2310 ± 0.1594 | 0.3321 ± 0.1676            | 0.2004 ± 0.1263       |
| deeplift/occlusion | 0.0525 ± 0.0533 | 0.0283 ± 0.0373 | 0.0335 ± 0.0394 | 0.0223 ± 0.0290 | 0.0327 ± 0.0349            | 0.0252 ± 0.0285       |

|                   |                     |                     |                     |                     |                     |                     |
|-------------------|---------------------|---------------------|---------------------|---------------------|---------------------|---------------------|
| deeplift/gradcam  | $0.3938 \pm 0.1788$ | $0.2316 \pm 0.1545$ | $0.3698 \pm 0.1836$ | $0.2289 \pm 0.1543$ | $0.3357 \pm 0.1723$ | $0.2031 \pm 0.1256$ |
| occlusion/gradcam | $0.3406 \pm 0.2107$ | $0.2194 \pm 0.1514$ | $0.4059 \pm 0.2057$ | $0.2394 \pm 0.1677$ | $0.3994 \pm 0.1810$ | $0.2149 \pm 0.1344$ |

|                    | ketone<br>positive  | ketone<br>all       | ether<br>positive   | ether<br>all        | carboxylic_acid<br>positive | carboxylic_acid<br>all |
|--------------------|---------------------|---------------------|---------------------|---------------------|-----------------------------|------------------------|
| shap/ig            | $0.0002 \pm 0.0013$ | $0.0001 \pm 0.0005$ | $0.0001 \pm 0.0003$ | $0.0001 \pm 0.0007$ | $0.0002 \pm 0.0009$         | $0.0001 \pm 0.0006$    |
| shap/deeplift      | $0.0013 \pm 0.0022$ | $0.0027 \pm 0.0112$ | $0.0021 \pm 0.0036$ | $0.0048 \pm 0.0145$ | $0.0023 \pm 0.0035$         | $0.0021 \pm 0.0045$    |
| shap/occlusion     | $0.0170 \pm 0.0192$ | $0.0197 \pm 0.0242$ | $0.0313 \pm 0.0382$ | $0.0265 \pm 0.0388$ | $0.0279 \pm 0.0255$         | $0.0195 \pm 0.0229$    |
| shap/gradcam       | $0.2845 \pm 0.1727$ | $0.1860 \pm 0.1174$ | $0.3746 \pm 0.1799$ | $0.2193 \pm 0.1476$ | $0.3081 \pm 0.1432$         | $0.1842 \pm 0.1213$    |
| ig/deeplift        | $0.0012 \pm 0.0019$ | $0.0027 \pm 0.0112$ | $0.0020 \pm 0.0036$ | $0.0046 \pm 0.0130$ | $0.0022 \pm 0.0033$         | $0.0020 \pm 0.0044$    |
| ig/occlusion       | $0.0166 \pm 0.0187$ | $0.0196 \pm 0.0241$ | $0.0312 \pm 0.0382$ | $0.0265 \pm 0.0386$ | $0.0282 \pm 0.0259$         | $0.0195 \pm 0.0230$    |
| ig/gradcam         | $0.2848 \pm 0.1729$ | $0.1860 \pm 0.1175$ | $0.3743 \pm 0.1803$ | $0.2193 \pm 0.1477$ | $0.3079 \pm 0.1439$         | $0.1842 \pm 0.1214$    |
| deeplift/occlusion | $0.0198 \pm 0.0246$ | $0.0194 \pm 0.0257$ | $0.0333 \pm 0.0384$ | $0.0257 \pm 0.0375$ | $0.0362 \pm 0.0326$         | $0.0206 \pm 0.0244$    |
| deeplift/gradcam   | $0.2730 \pm 0.1703$ | $0.1890 \pm 0.1163$ | $0.3575 \pm 0.1803$ | $0.2202 \pm 0.1437$ | $0.2921 \pm 0.1418$         | $0.1831 \pm 0.1192$    |
| occlusion/gradcam  | $0.3193 \pm 0.1843$ | $0.1905 \pm 0.1219$ | $0.4047 \pm 0.2080$ | $0.2236 \pm 0.1555$ | $0.3991 \pm 0.1703$         | $0.1980 \pm 0.1349$    |

|                    | arene<br>positive | arene<br>all    | carboxylic_amides<br>positive | carboxylic_amides<br>all | nitro<br>positive | nitro<br>all    |
|--------------------|-------------------|-----------------|-------------------------------|--------------------------|-------------------|-----------------|
| shap/ig            | 0.0002 ± 0.0018   | 0.0002 ± 0.0015 | 0.0001 ± 0.0003               | 0.0002 ± 0.0009          | 0.0000 ± 0.0001   | 0.0001 ± 0.0008 |
| shap/deeplift      | 0.0014 ± 0.0025   | 0.0026 ± 0.0048 | 0.0102 ± 0.0118               | 0.0070 ± 0.0124          | 0.0010 ± 0.0012   | 0.0034 ± 0.0067 |
| shap/occlusion     | 0.0121 ± 0.0113   | 0.0196 ± 0.0300 | 0.0362 ± 0.0276               | 0.0374 ± 0.0613          | 0.0112 ± 0.0132   | 0.0182 ± 0.0242 |
| shap/gradcam       | 0.2486 ± 0.1418   | 0.2393 ± 0.1421 | 0.3275 ± 0.1688               | 0.1960 ± 0.1250          | 0.2038 ± 0.1347   | 0.1802 ± 0.1132 |
| ig/deeplift        | 0.0011 ± 0.0017   | 0.0024 ± 0.0047 | 0.0098 ± 0.0107               | 0.0067 ± 0.0115          | 0.0010 ± 0.0013   | 0.0033 ± 0.0062 |
| ig/occlusion       | 0.0118 ± 0.0108   | 0.0194 ± 0.0300 | 0.0365 ± 0.0280               | 0.0374 ± 0.0614          | 0.0112 ± 0.0131   | 0.0182 ± 0.0243 |
| ig/gradcam         | 0.2484 ± 0.1421   | 0.2392 ± 0.1421 | 0.3272 ± 0.1685               | 0.1959 ± 0.1251          | 0.2039 ± 0.1346   | 0.1803 ± 0.1132 |
| deeplift/occlusion | 0.0122 ± 0.0113   | 0.0205 ± 0.0325 | 0.0474 ± 0.0418               | 0.0430 ± 0.0701          | 0.0129 ± 0.0153   | 0.0189 ± 0.0286 |
| deeplift/gradcam   | 0.2416 ± 0.1401   | 0.2357 ± 0.1403 | 0.3203 ± 0.1696               | 0.1964 ± 0.1245          | 0.2005 ± 0.1329   | 0.1826 ± 0.1148 |
| occlusion/gradcam  | 0.2585 ± 0.1401   | 0.2452 ± 0.1386 | 0.4103 ± 0.2102               | 0.2139 ± 0.1430          | 0.2353 ± 0.1481   | 0.1921 ± 0.1188 |

|                    | hydroxyl<br>positive | hydroxyl<br>all |
|--------------------|----------------------|-----------------|
| shap/ig            | 0.0002 ± 0.0014      | 0.0001 ± 0.0007 |
| shap/deeplift      | 0.0011 ± 0.0021      | 0.0054 ± 0.0079 |
| shap/occlusion     | 0.0457 ± 0.0572      | 0.0329 ± 0.0376 |
| shap/gradcam       | 0.4473 ± 0.1916      | 0.2539 ± 0.1744 |
| ig/deeplift        | 0.0010 ± 0.0018      | 0.0053 ± 0.0078 |
| ig/occlusion       | 0.0453 ± 0.0570      | 0.0327 ± 0.0374 |
| ig/gradcam         | 0.4471 ± 0.1918      | 0.2538 ± 0.1743 |
| deeplift/occlusion | 0.0431 ± 0.0525      | 0.0358 ± 0.0383 |
| deeplift/gradcam   | 0.4319 ± 0.1939      | 0.2599 ± 0.1683 |
| occlusion/gradcam  | 0.4048 ± 0.2276      | 0.2364 ± 0.1742 |
